# Supplementary material for: Effect of SARS-CoV-2 Breakthrough Infection on HIV Reservoirs and T-Cell Immune Recovery in 3-Dose Vaccinated People Living with HIV
Source: MDPI journal article supplement (doi:10.3390/v15122427), 2023-12-14
Supplement: s1 [file s1]

## Supplementary Materials

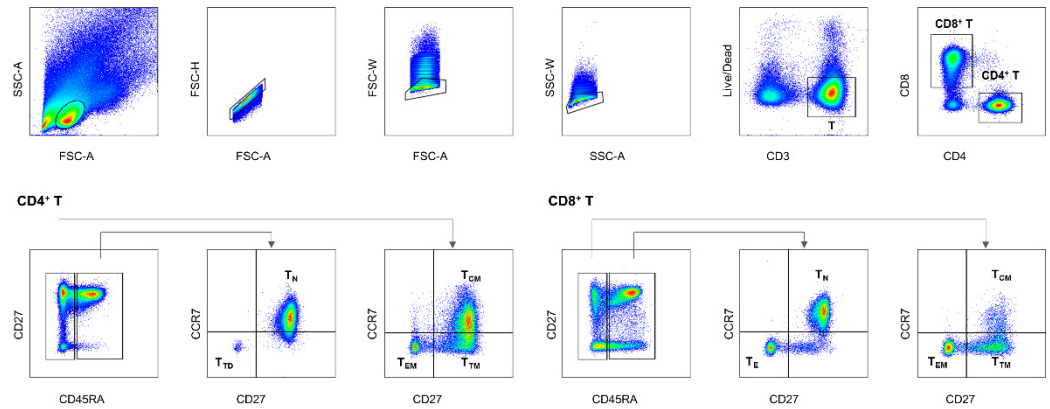

**Supplementary Figure S1.** Gating strategies used in this study. T cells were identified by gating on lymphocytes (FSC-A vs. SSC-A), singlets (FSC-A vs. FSC-H, FSC-A vs. FSC-W, and SSC-A vs. SSC-W) and live T cells (CD3 vs. Live/Dead). CD4 and CD8 T cells were identified using anti-CD4 and anti-CD8 antibodies, respectively. CD4 and CD8 T cell subsets were further identified by CD45RA, CD27, and CCR7 expression: naïve (T<sub>N</sub>, CD45RA<sup>+</sup>CD27<sup>+</sup>CCR7<sup>+</sup>), central memory (T<sub>CM</sub>, CD45RA<sup>-</sup>CD27<sup>+</sup>CCR7<sup>-</sup>), transitional memory (T<sub>TM</sub>, CD45RA<sup>-</sup>CD27<sup>+</sup>CCR7<sup>-</sup>), effector memory (T<sub>EM</sub>, CD45RA<sup>-</sup>CD27<sup>-</sup>CCR7<sup>-</sup>), and terminal differentiated/effector (T<sub>TD</sub>/T<sub>E</sub>, CD45RA<sup>+</sup>CD27<sup>-</sup>CCR7<sup>-</sup>).
